# Supplementary material for: Quercetin Alleviates LPS-Induced Depression-Like Behavior in Rats via Regulating BDNF-Related Imbalance of Copine 6 and TREM1/2 in the Hippocampus and PFC
Source: PubMed Central journal article supplement (PMC6978986; doi:10.3389/fphar.2019.01544), 2020-01-17

**Supplementary materials:**

**Legends of the figure**

**Fig. S1 effect of quercetin on the performance of mice in the forced swimming test and tail suspending test**

The data are presented as the mean  $\pm$  SEM, with 9 rats in each group.

Compared with that in the control group, the immobility time in the FST (A) and TST (B) was significant shorter in the quercetin-treated group.

$^{\#}P < 0.05$  and  $^{\#\#}P < 0.001$  compared with the control group.

Fig. S1

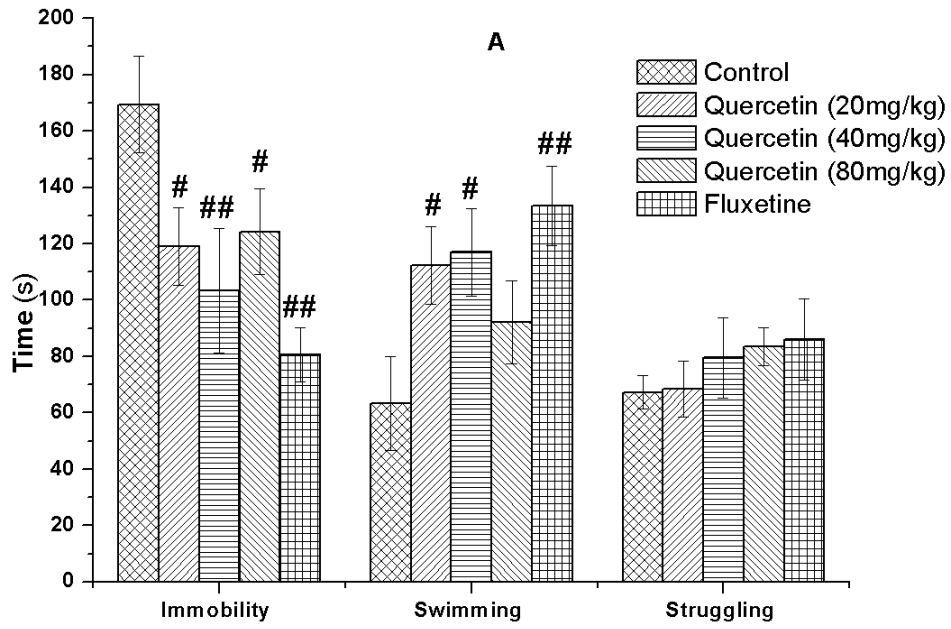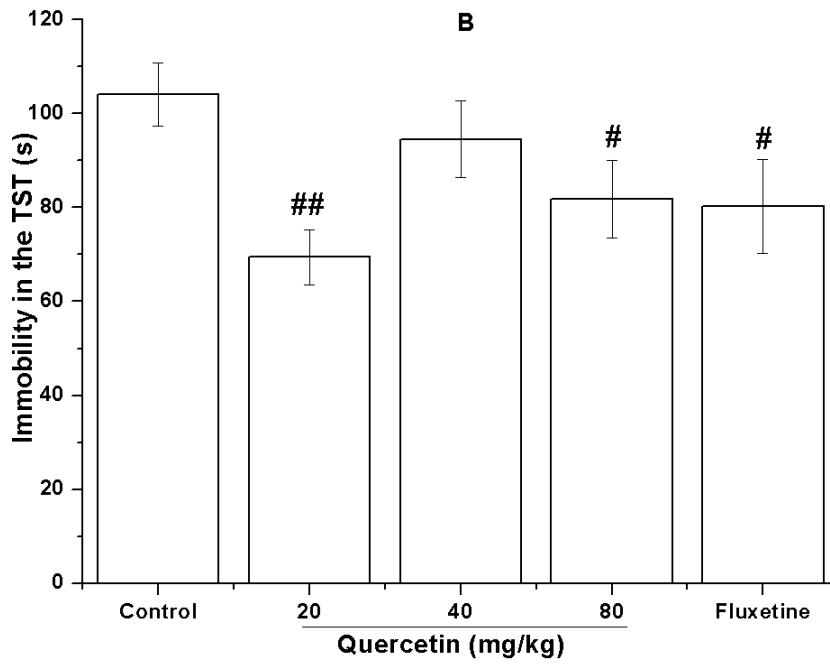

Supplement: Image_1.pdf [file Image_1.pdf]
